# Supplementary material for: Exosomal miR-663b exposed to TGF-β1 promotes cervical cancer metastasis and epithelial-mesenchymal transition by targeting MGAT3
Source: PubMed Central journal article supplement — Oncol Rep. 2021 Feb 2;45(4):12. doi: 10.3892/or.2021.7963 (PMC7877003; doi:10.3892/or.2021.7963), 2021-02-02

Figure S1. Efficiency of lentiviral transfection was confirmed by the intensity and ratio of green fluorescence. (A) The green fluorescence of HeLa cells transfected with miR-663b NC and miR-663b-KD virus. (B) The green fluorescence of CaSki cells transfected with miR-663b NC and miR-663b-KD virus. Magnification, x100. NC, negative control; KD, knockdown.

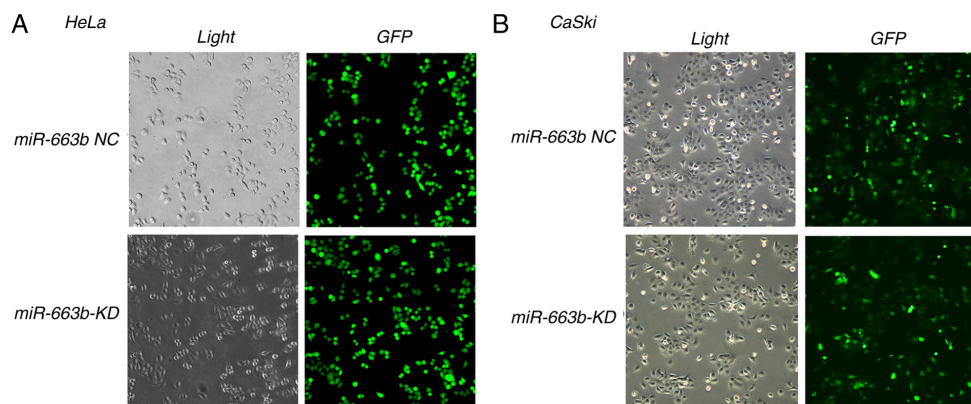

Supplement: Supplementary_Data.pdf [file Supplementary_Data.pdf]
